# Supplementary material for: Plasma neutralization properties of the SARS-CoV-2 Omicron variant
Source: bioRxiv or medRxiv preprint supplement (doi:10.1101/2021.12.12.21267646), 2021-12-13
Supplement: Supplementary file [file media-1.pdf]

# Supplementary Appendix

This appendix has been provided by the authors to give readers additional information about their work.

Supplement to Fabian Schmidt, Frauke Muecksch, Yiska Weisblum, Justin Da Silva, Eva Bednarski, Alice Cho, Zijun Zhang, Christian Gaebler, Marina Caskey, Michel C. Nussenzweig, Theodora Hatzioannou, and Paul D. Bieniasz Plasma neutralization properties of the SARS-CoV-2 Omicron variant

Table S1. Individual convalescent participant characteristics

| ID  | Age (years) | Sex | Temporal dynamics (days)         |                                  | Vaccination status |                                 |                         |
|-----|-------------|-----|----------------------------------|----------------------------------|--------------------|---------------------------------|-------------------------|
|     |             |     | Sx onset to initial visit (1.3m) | Sx onset to follow-up visit (1y) | Vaccine received   | # of doses received prior to 1y | Days between first dose |
| 8   | 36-40       | M   | 57                               | 370                              | N                  | N/A                             | N/A                     |
| 9   | 31-35       | F   | 53                               | 366                              | N                  | N/A                             | N/A                     |
| 21  | 51-55       | M   | 27                               | 340                              | N                  | N/A                             | N/A                     |
| 38  | 56-60       | F   | 38                               | 337                              | N                  | N/A                             | N/A                     |
| 40  | 41-45       | M   | 23                               | 345                              | N                  | N/A                             | N/A                     |
| 46  | 36-40       | M   | 30                               | 337                              | N                  | N/A                             | N/A                     |
| 47  | 41-45       | F   | 33                               | 340                              | N                  | N/A                             | N/A                     |
| 72  | 41-45       | M   | 35                               | 352                              | N                  | N/A                             | N/A                     |
| 75  | 46-50       | F   | 36                               | 340                              | N                  | N/A                             | N/A                     |
| 76  | 46-50       | F   | 34                               | 379                              | N                  | N/A                             | N/A                     |
| 328 | 51-55       | F   | 62                               | 365                              | N                  | N/A                             | N/A                     |
| 353 | 56-60       | M   | 49                               | 366                              | N                  | N/A                             | N/A                     |
| 403 | 51-55       | M   | 39                               | 356                              | N                  | N/A                             | N/A                     |
| 410 | 31-35       | M   | 46                               | 349                              | N                  | N/A                             | N/A                     |
| 437 | 41-45       | F   | 34                               | 353                              | N                  | N/A                             | N/A                     |
| 461 | 46-50       | M   | 39                               | 350                              | N                  | N/A                             | N/A                     |
| 501 | 31-35       | M   | 53                               | 367                              | N                  | N/A                             | N/A                     |
| 507 | 36-40       | M   | 60                               | 361                              | N                  | N/A                             | N/A                     |
| 547 | 56-60       | M   | 36                               | 359                              | N                  | N/A                             | N/A                     |
| 633 | 36-40       | M   | 57                               | 358                              | N                  | N/A                             | N/A                     |
| 7   | 36-40       | M   | 30                               | 376                              | Pfizer-BNT         | 2                               | 65                      |
| 20  | 26-30       | F   | 17                               | 345                              | Moderna            | 2                               | 35                      |
| 24  | 31-35       | M   | 30                               | 336                              | Pfizer-BNT         | N/A                             | N/A                     |
| 55  | 36-40       | M   | 49                               | 349                              | Moderna            | 2                               | 41                      |
| 71  | 41-45       | F   | 48                               | 386                              | Pfizer-BNT         | 2                               | 62                      |
| 96  | 46-50       | F   | 30                               | 359                              | Pfizer-BNT         | 2                               | 54                      |
| 115 | 61-65       | F   | 41                               | 335                              | Moderna            | 1                               | 12                      |
| 120 | 56-60       | F   | 48                               | 375                              | Moderna            | 2                               | 67                      |
| 135 | 61-65       | F   | 31                               | 341                              | Moderna            | 1                               | 27                      |
| 186 | 36-40       | F   | 33                               | 356                              | Pfizer-BNT         | 2                               | 73                      |
| 222 | 26-30       | M   | 37                               | 347                              | Pfizer-BNT         | 2                               | 41                      |
| 230 | 46-50       | M   | 33                               | 372                              | Pfizer-BNT         | N/A                             | N/A                     |
| 233 | 51-55       | M   | 41                               | 377                              | Moderna            | 1                               | 8                       |
| 325 | 51-55       | M   | 38                               | 353                              | Moderna            | 2                               | 49                      |
| 393 | 66-70       | M   | 54                               | 362                              | Moderna            | 2                               | 57                      |
| 394 | 46-50       | F   | 67                               | 375                              | Moderna            | N/A                             | N/A                     |
| 401 | 61-65       | M   | 53                               | 371                              | Pfizer-BNT         | 1                               | 18                      |
| 500 | 46-50       | M   | 53                               | 375                              | Pfizer-BNT         | 1                               | 20                      |
| 537 | 51-55       | M   | 45                               | 357                              | Pfizer-BNT         | 1                               | 14                      |
| 539 | 71-75       | F   | 55                               | 362                              | Pfizer-BNT         | 2                               | 50                      |

**Table S2. Individual vaccinated participant characteristics**

| ID   | Age (years) | Sex | Vaccine platform |            |            | Vaccination time line (days) |                 |                                         |                                         |                              |
|------|-------------|-----|------------------|------------|------------|------------------------------|-----------------|-----------------------------------------|-----------------------------------------|------------------------------|
|      |             |     | 1st dose         | 2nd dose   | 3rd dose   | 1st to 2nd dose              | 2nd to 3rd dose | 2nd (mRNA)/ 1st (J&J) dose to 1st visit | 2nd (mRNA)/ 1st (J&J) dose to 2nd visit | 3rd (mRNA) dose to Follow-up |
| C001 | 36-40       | F   | Pfizer-BNT       | Pfizer-BNT | Pfizer-BNT | 22                           | 251             | 35                                      | 133                                     | 56                           |
| C002 | 41-45       | M   | Pfizer-BNT       | Pfizer-BNT | Pfizer-BNT | 21                           | 373             | 79                                      | 177                                     | 27                           |
| C004 | 36-40       | M   | Pfizer-BNT       | Pfizer-BNT | Pfizer-BNT | 21                           | 389             | 70                                      | 170                                     | 27                           |
| C005 | 46-50       | M   | Moderna          | Moderna    | Pfizer-BNT | 28                           | 326             | 91                                      | 175                                     | 94                           |
| C006 | 61-65       | M   | Pfizer-BNT       | Pfizer-BNT | Pfizer-BNT | 21                           | 246             | 22                                      | 146                                     | 22                           |
| C007 | 26-30       | M   | Pfizer-BNT       | Pfizer-BNT | Pfizer-BNT | 21                           | 252             | 37                                      | 141                                     | 21                           |
| C008 | 51-55       | F   | Pfizer-BNT       | Pfizer-BNT | Pfizer-BNT | 21                           | 244             | 35                                      | 141                                     | 28                           |
| C009 | 31-35       | F   | Pfizer-BNT       | Pfizer-BNT | Pfizer-BNT | 21                           | 244             | 36                                      | 141                                     | 22                           |
| C010 | 66-70       | F   | Pfizer-BNT       | Pfizer-BNT | Pfizer-BNT | 21                           | 245             | 34                                      | 146                                     | 21                           |
| C011 | 71-75       | F   | Moderna          | Moderna    | Pfizer-BNT | 28                           | 274             | 28                                      | 131                                     | 21                           |
| C017 | 21-25       | M   | Pfizer-BNT       | Pfizer-BNT | Pfizer-BNT | 21                           | 252             | 21                                      | 244                                     | 21                           |
| C018 | 21-25       | F   | Pfizer-BNT       | Pfizer-BNT | Pfizer-BNT | 21                           | 242             | 48                                      | 172                                     | 23                           |
| C019 | 31-35       | M   | Pfizer-BNT       | Pfizer-BNT | Pfizer-BNT | 21                           | 245             | 34                                      | 146                                     | 21                           |
| C021 | 36-40       | F   | Pfizer-BNT       | Pfizer-BNT | Pfizer-BNT | 21                           | 212             | 28                                      | 168                                     | 47                           |
| C028 | 21-25       | M   | Pfizer-BNT       | Pfizer-BNT | Pfizer-BNT | 21                           | 252             | 41                                      | 168                                     | 28                           |
| C029 | 56-60       | F   | Pfizer-BNT       | Pfizer-BNT | Pfizer-BNT | 21                           | 244             | 49                                      | 166                                     | 22                           |
| C031 | 26-30       | M   | Pfizer-BNT       | Pfizer-BNT | Pfizer-BNT | 21                           | 242             | 37                                      | 165                                     | 28                           |
| C034 | 36-40       | F   | Pfizer-BNT       | Pfizer-BNT | Pfizer-BNT | 24                           | 273             | 31                                      | 245                                     | 19                           |
| C055 | 36-40       | F   | J&J              | -          | -          | -                            | -               | 34                                      | 175                                     | -                            |
| C056 | 56-60       | F   | J&J              | -          | -          | -                            | -               | 52                                      | 187                                     | -                            |
| C057 | 26-30       | M   | J&J              | -          | -          | -                            | -               | 44                                      | 178                                     | -                            |
| C059 | 21-25       | F   | J&J              | -          | -          | -                            | -               | 44                                      | 181                                     | -                            |
| C060 | 51-55       | M   | J&J              | -          | -          | -                            | -               | 35                                      | 191                                     | -                            |
| C061 | 46-50       | F   | J&J              | -          | -          | -                            | -               | 27                                      | 177                                     | -                            |
| C062 | 31-35       | F   | J&J              | -          | -          | -                            | -               | 53                                      | 200                                     | -                            |
| C064 | 36-40       | F   | J&J              | -          | -          | -                            | -               | 46                                      | 178                                     | -                            |
| C066 | 46-50       | F   | J&J              | -          | -          | -                            | -               | 50                                      | 183                                     | -                            |
| C067 | 46-50       | F   | J&J              | -          | -          | -                            | -               | 52                                      | 193                                     | -                            |
| C069 | 51-55       | F   | J&J              | -          | -          | -                            | -               | 37                                      | 172                                     | -                            |
| C070 | 41-45       | M   | J&J              | -          | -          | -                            | -               | 67                                      | 187                                     | -                            |
| C072 | 41-45       | F   | J&J              | -          | -          | -                            | -               | 63                                      | 150                                     | -                            |
| C073 | 41-45       | F   | J&J              | -          | -          | -                            | -               | 56                                      | 197                                     | -                            |
| C075 | 31-35       | M   | J&J              | -          | -          | -                            | -               | 72                                      | 180                                     | -                            |
| C076 | 31-35       | M   | J&J              | -          | -          | -                            | -               | 72                                      | 179                                     | -                            |
| C079 | 51-55       | M   | J&J              | -          | -          | -                            | -               | 46                                      | 152                                     | -                            |
| C080 | 31-35       | M   | J&J              | -          | -          | -                            | -               | 34                                      | 140                                     | -                            |
| C081 | 41-45       | M   | J&J              | -          | -          | -                            | -               | 31                                      | 136                                     | -                            |
